# Supplementary material for: A supramolecular liquid crystal/photonic crystal composite film with broad diffraction-wavelength shifts/fast responses to pH changes
Source: Royal Society of Chemistry journal article supplement (doi:10.1039/d3tc02905k), 2023-01-01
Supplement: d3tc02905k2.pdf [file d3tc02905k2.pdf]

## **A supramolecular liquid crystal/photonic crystal composite film with broad diffraction-wavelength shifts/fast response to pH changes**

Runzi Lu<sup>†a</sup>, Changjing Cheng<sup>†a,b</sup>, Li Wang<sup>a</sup>, Huiyao Zhang<sup>a</sup>, Hongju Zeng<sup>a,c</sup>, Yanlin Wang<sup>a</sup>, Jingya Wen<sup>a</sup>, Xingbin Lv<sup>a,b</sup>, Hairong Yu<sup>a,b</sup> and Ting Liang<sup>\*a,b</sup>

a. College of Chemistry and Environment, Southwest Minzu University, Chengdu, Sichuan 610200, PR China.

b. Key Laboratory of Pollution Control Chemistry and Environmental Functional Materials for Qinghai-Tibet Plateau of the National Ethnic Affairs Commission, Chengdu, Sichuan 610200, PR China.

c. Chengdu BOE Display Sci-tech Co. Ltd., Chengdu, Sichuan 610200, PR China.

*Email:* liangting@swun.edu.cn

<sup>†</sup>Those authors contributed equally to this work.

**Table S1** LC-based PC materials developed in the recent decades.

| Materials                                          | $\Delta\lambda_{\max}$<br>(nm) | Response<br>time | Stability<br>(Cycles)           | Application                                  | Ref.         |
|----------------------------------------------------|--------------------------------|------------------|---------------------------------|----------------------------------------------|--------------|
| Azobenzene-containing<br>CLCPs                     | -                              | -                | 5 cycles                        | Photo/thermal dual-<br>response              | [1]          |
| SiO <sub>2</sub> opal PC/LCE                       | 16 nm                          | -                | 6 cycles                        | Thermal response                             | [2]          |
| SiO <sub>2</sub> inverse opal PC/LCE               | 50 nm                          | -                | 5 cycles                        | Thermal response                             | [3]          |
| Janus azobenzene inverse<br>opal actuator          | -                              | -                | -                               | Photo-, solvent-, and<br>thermal-response    | [4]          |
| SiO <sub>2</sub> inverse opal PC/LCE               | 28 nm                          | -                | -                               | Thermal response                             | [5]          |
| Azobenzene inverse opals                           | 60 nm                          | 2 s              | Repeated more<br>than 100 times | Inkless rewritable<br>paper                  | [6]          |
| Cholesteric LC network-<br>based PCs               | 163 nm                         | Within 5<br>s    | 5 cycles                        | Humidity and SO <sub>2</sub> gas<br>response | [7]          |
| LC-based inverse opal film                         | 16 nm                          | -                | 10 cycles                       | Thermo-, photo-, and<br>mechano-responsive   | [8]          |
| Chiral hydrogen-bonded<br>self-assembled complexes | 190 nm                         | 70 s             | 5 cycles                        | Thermal switching<br>reflective color film   | [9]          |
| SLC/PC film                                        | 250                            | < 0.5 s          | > 50 cycles                     | PH/thermal response                          | This<br>work |

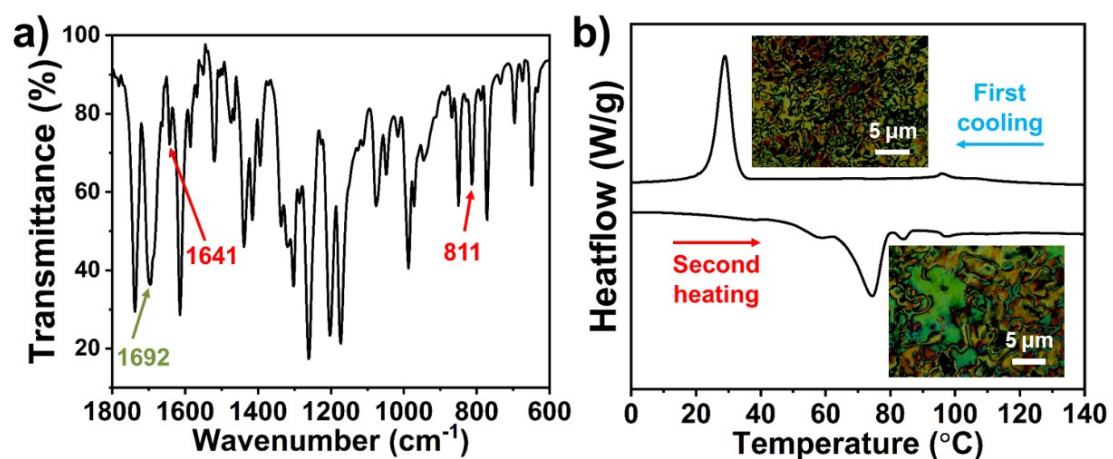

**Fig. S1** (a) FT-IR spectrum of the monomer mixture. (b) DSC spectra and POM pictures (*insets*) of the monomer mixture at different temperatures during the first cooling and second heating processes.

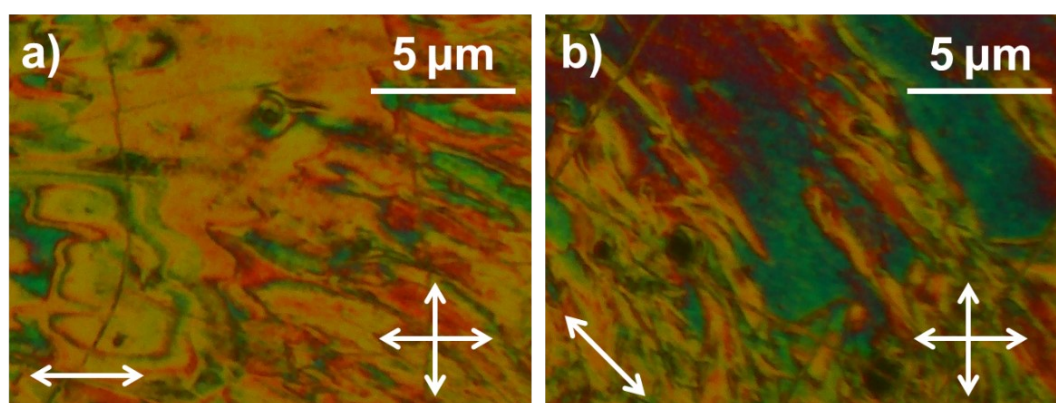

**Fig. S2** POM images of the SLC/PC opal composite film. The single arrow shows the alignment direction. The axes of the crossed polarizers are represented by the crossed arrows.

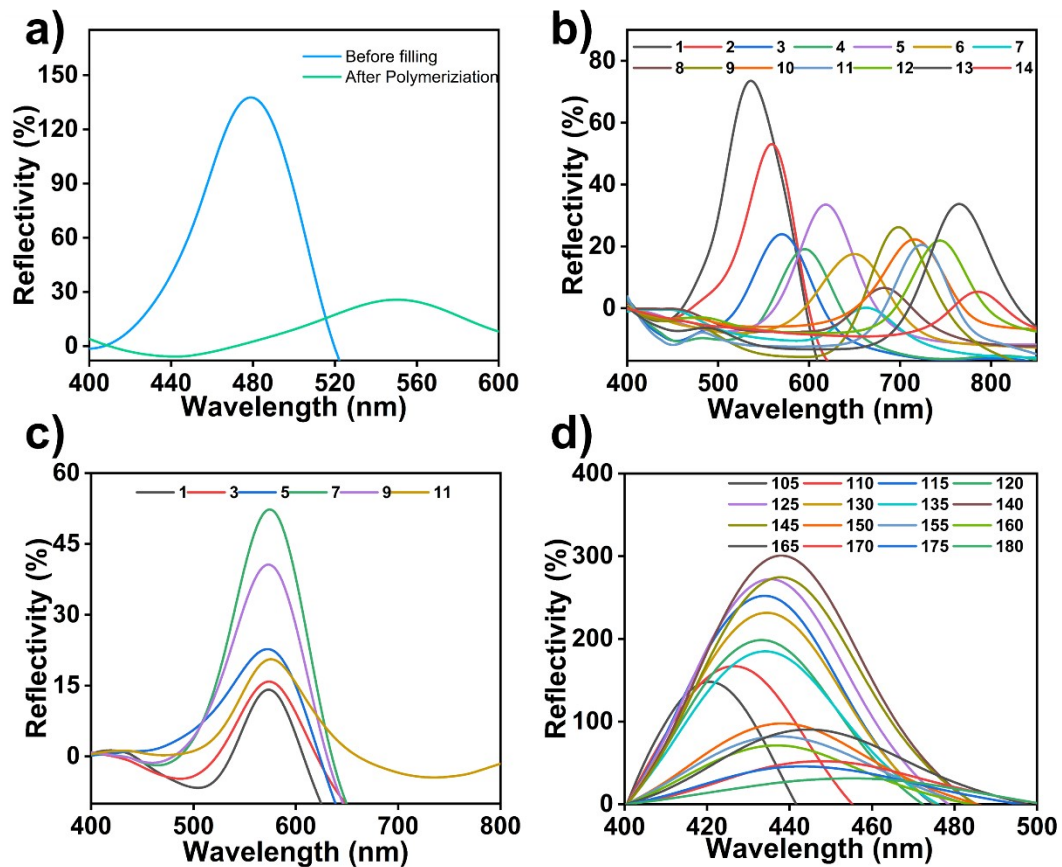

**Fig. S3** (a) Reflection spectra of the samples before filling with SLC monomer (*Blue*) and after UV-induced polymerization (*Green*). The diffraction wavelength shifts of the SLC/PC inverse opal composite film (b) as a function of pH value, (c) with no alignment at various pH values, (d) as a function of temperatures of 100–180 °C. (Not normalized)

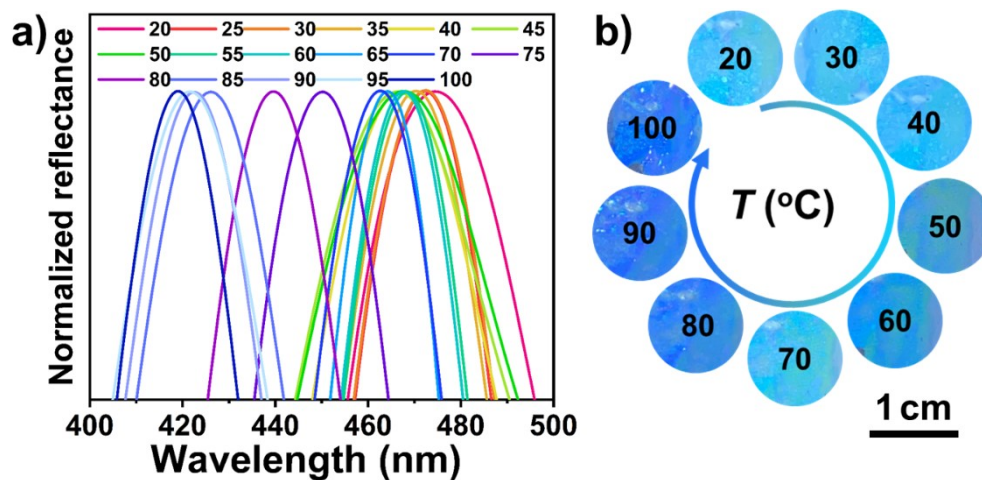

**Fig. S4** Reflection spectra (a) and structural colors (b) of the SLC/PC inverse opal film as a function of temperatures from 20 to 100 °C.

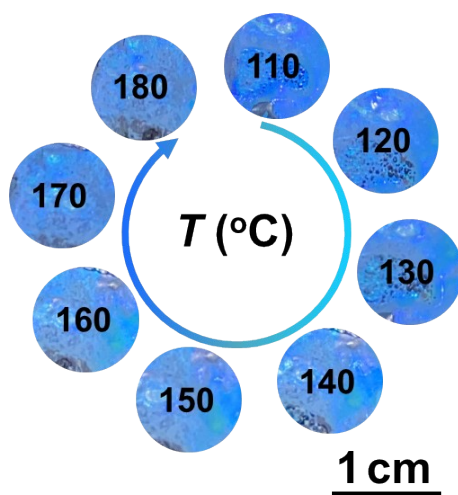

**Fig. S5** Structural color changes of the inverse opal composite film as a function of temperatures ranging from 110 to 180 °C.

## References

- [1] J. Zhao, Y. Liu, Y. Yu, Dual-responsive inverse opal films based on a crosslinked liquid crystal polymer containing azobenzene, *J. Mater. Chem. C*, 2014, **2**, 10262–10267.
- [2] H. Xing, J. Li, Y. Shi, J. Guo, J. Wei, Thermally driven photonic actuator based on silica opal photonic crystal with liquid crystal elastomer, *ACS Appl. Mater. Interfaces*, 2016, **8**, 9440–9445.
- [3] H. Xing, J. Li, J. Guo, J. Wei, Bio-inspired thermal-responsive inverse opal films with dual structural colors based on liquid crystal elastomer, *J. Mater. Chem. C*, 2015, **3**, 4424–4430.
- [4] J. Liu, J. Wang, T. Ikeda, L. Jiang, Liquid-Phase super photoactuator through the synergetic effects of a Janus structure and solvent/thermal/photo responses, *Adv. Funct. Mater.*, 2021, **31**, 2105728–2105739.
- [5] G. Wu, Y. Jiang, D. Xu, H. Tang, X. Liang, G. Li, Thermoresponsive inverse opal films

- fabricated with liquid-crystal elastomers and nematic liquid crystals, *Langmuir*, 2011, **27**, 1505–1509.
- [6] J. Liu, Y. Wang, J. Wang, G. Zhou, T. Ikeda, L. Jiang, Inkless rewritable photonic crystals paper enabled by a light-driven azobenzene mesogen switch, *ACS Appl. Mater. Interfaces*, 2021, **13**, 12383–12392.
- [7] C. Shen, Z. Wang, R. Huang, J. Bao, Z. Li, L. Zhang, R. Lan, H. Yang, Humidity-responsive photonic crystals with pH and SO<sub>2</sub> gas detection ability based on cholesteric liquid crystalline networks, *ACS Appl. Mater. Interfaces*, 2022, **14**, 16764–16771.
- [8] N. Akamatsu, K. Hisano, R. Tatsumi, M. Aizawa, C.J. Barrett, A. Shishido, Thermo-, photo-, and mechano-responsive liquid crystal networks enable tunable photonic crystals, *Soft Matter.*, 2017, **13**, 7486–7491.
- [9] F. Chen, J. Guo, Z. Qu, J. Wei, Novel photo-polymerizable chiral hydrogen-bonded self-assembled complexes: Preparation, characterization and the utilization as a thermal switching reflective color film, *J. Mater. Chem.*, 2011, **21**, 8574–8582.
